# Supplementary material for: Single cell clonal analysis identifies an AID‐dependent pathway of plasma cell differentiation
Source: PubMed Central journal article supplement — EMBO Rep. 2022 Oct 7;23(12):e55000. doi: 10.15252/embr.202255000 (PMC9724673; doi:10.15252/embr.202255000), 2022-10-07
Supplement: EMBR-23-e55000-s001.pdf [file EMBR-23-e55000-s001.pdf]

## Expanded View Figures

### Figure EV1. Mouse model and experimental design.

- A Genetic model to study the GC reaction with a fluorescent tracer.  $Aicda^{Cre^{+/ki}}$ ;  $R26tdTom^{+/ki}$  ( $Aicda^{Cre/+}$ ), and  $Aicda^{Cre^{-/ki}}$ ;  $R26tdTom^{+/ki}$  ( $Aicda^{Cre/-}$ ) mice are shown.
- B Complete gating strategy for B cell subsets analyzed in Fig 1B and C.
- C FACS representative plots and quantification of IgG1, IgG2B, and IgG2C within B cell populations in Fig 1C ( $n = 6$   $Aicda^{Cre/+}$  mice).
- D Antibody titers specific for OVA were measured in the plasma of control  $Aicda^{Cre/+}$  mice (PBS;  $n = 3$ ) and immunized  $Aicda^{Cre/+}$  mice (OVA;  $n = 8$ ) by ELISA. Statistics were calculated with the paired  $t$ -test. \*\*\*\* $P < 0.0001$ .  $n$  indicates biological replicates.
- E Experimental approach followed for single cell RNA sequencing.

Data information: Bars and error bars indicate mean  $\pm$  standard deviation.

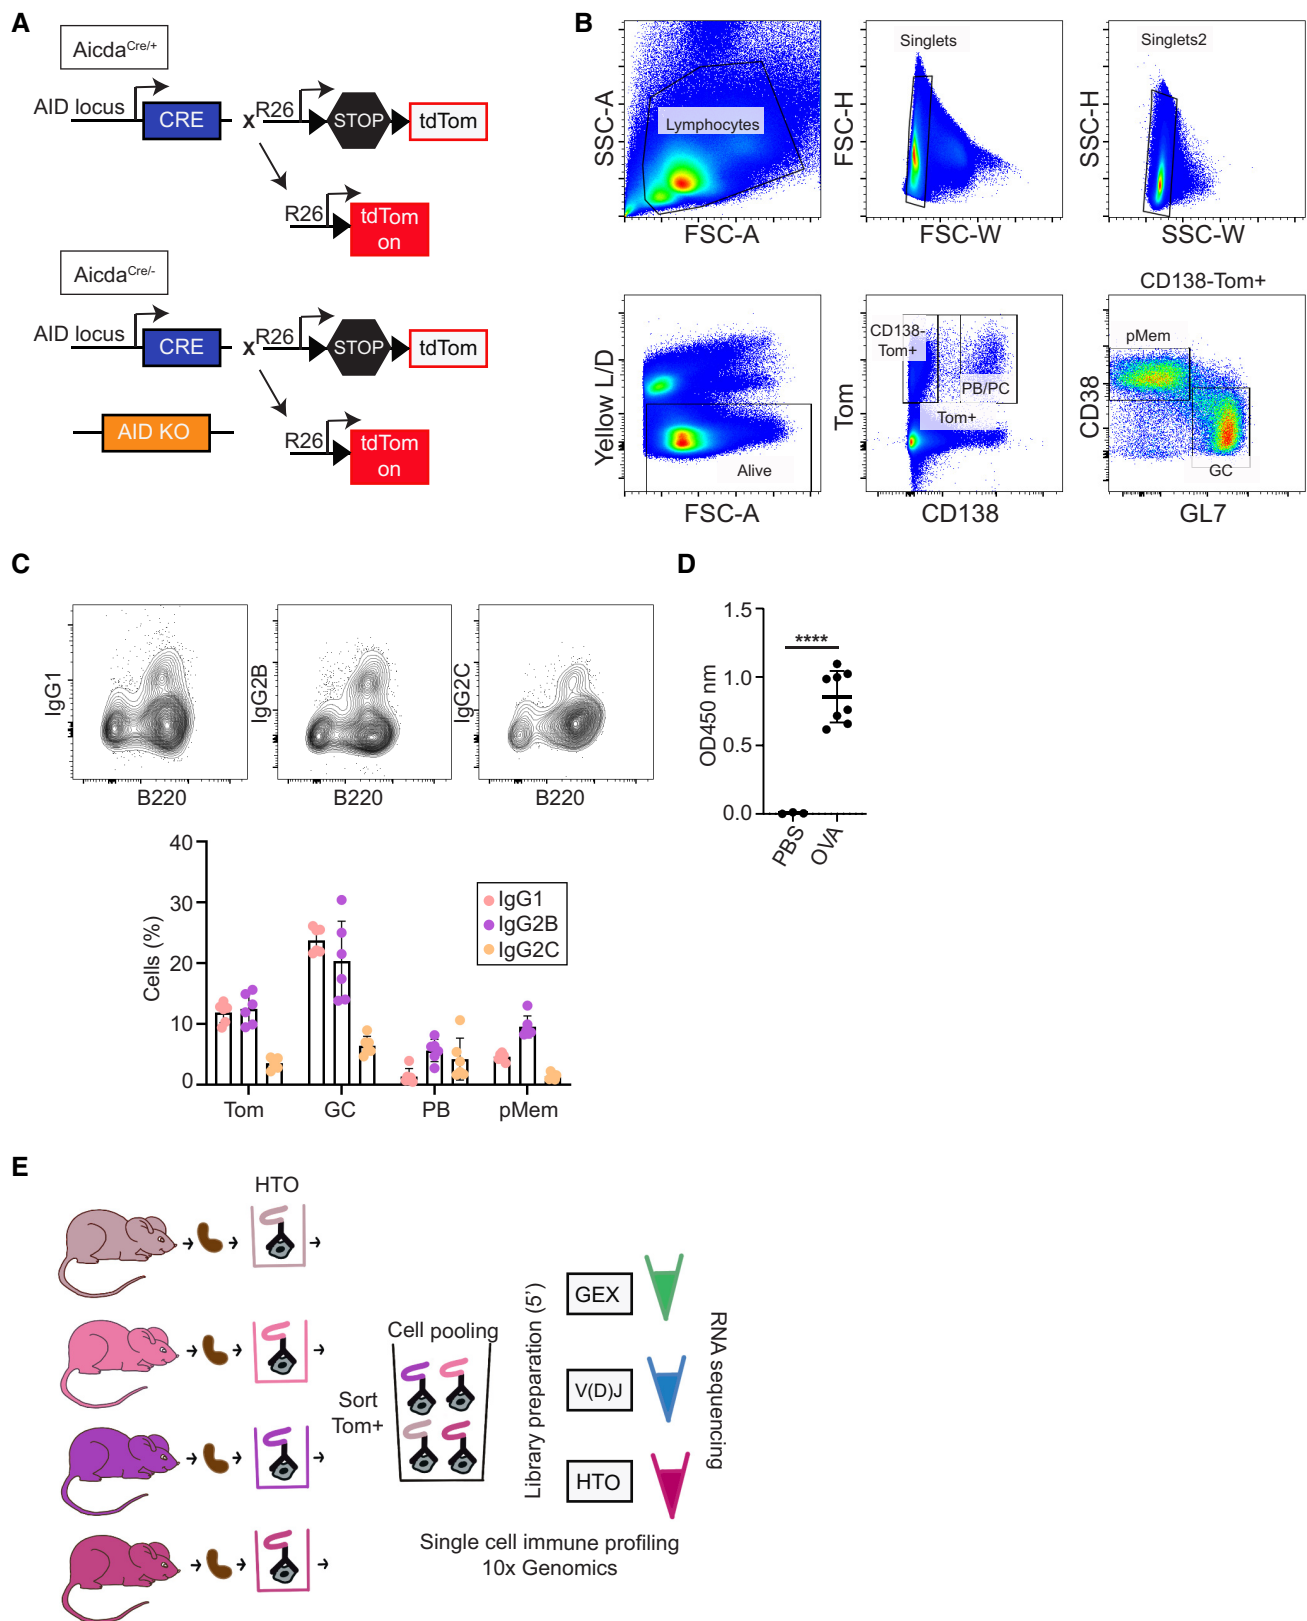

Figure EV1.

**Figure EV2. Cluster analysis.**

- A UMAP plot showing transcriptional clusters obtained before cluster 0 subclustering.
- B UMAP plot showing three transcriptionally distinct subclusters (0a, 0b, and 0c).
- C Dot plot depicting the expression levels of the top 10 upregulated genes in clusters 0a, 0b, and 0c.
- D Anti-FcR $\gamma$  antibody test. Representative flow cytometry plots of B3Z (NIH) parental cells (left) and FcR $\gamma$ -CD2-transfected cell lines stained with anti-FcR $\gamma$  and anti-CD2 antibodies.
- E Gating strategy for L-prePB identification by flow cytometry and cell sorting. L-prePB backgating shown in black.
- F Expression analysis of the indicated genes obtained by scRNA-seq shown in Fig 3A. <sup>a</sup>Average log2 fold change between the two groups being compared. <sup>b</sup>Proportion of cells expressing the indicated gene within FcR $\gamma^+$  cells. <sup>c</sup>Proportion of cells expressing the indicated gene within the non-FcR $\gamma^+$  cells.
- G FACS representative plot for L-prePB staining in the spleen of *Aicda*<sup>Cre/+</sup> mice 2 weeks after a single OVA immunization.
- H Anti-FcR $\gamma$  staining in GL7<sup>-</sup> and GL7<sup>+</sup> cells within live, singlets, Tom<sup>+</sup>, CD138<sup>-</sup>, B220<sup>+</sup> gated cells.
- I *Aicda*<sup>Cre/+</sup> mice ( $n = 7$ ) were immunized with OVA following the protocol in Fig 1A. Four mice were sacrificed 2 weeks after the first immunization. The proportion of prePB (Tom<sup>+</sup> B220<sup>+</sup> CD138<sup>-</sup> GL7<sup>-</sup> FcR $\gamma^+$ ) and PB (Tom<sup>+</sup> CD138<sup>+</sup>) cells was determined by flow cytometry within total live cells.

Data information: Bars and error bars indicate mean  $\pm$  standard deviation.

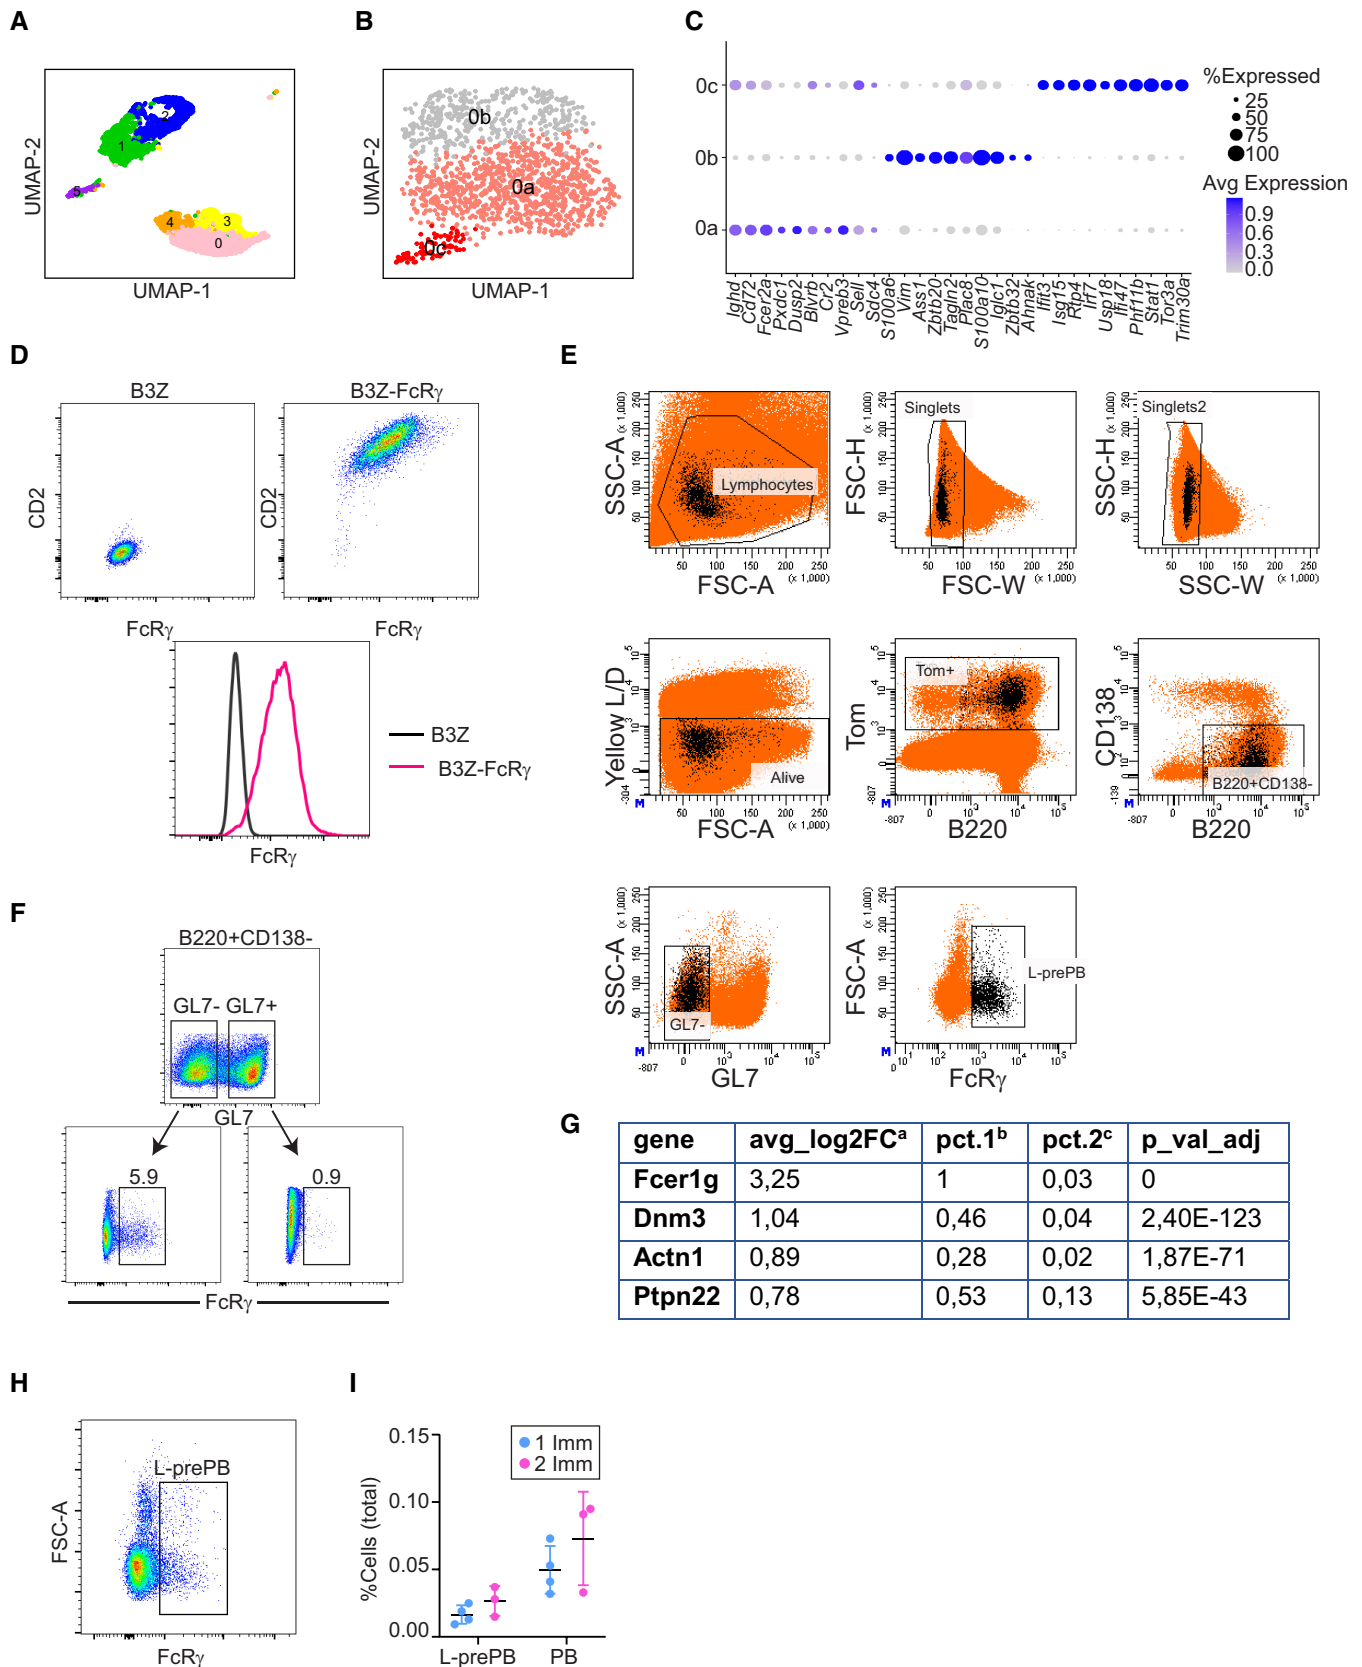

Figure EV2.

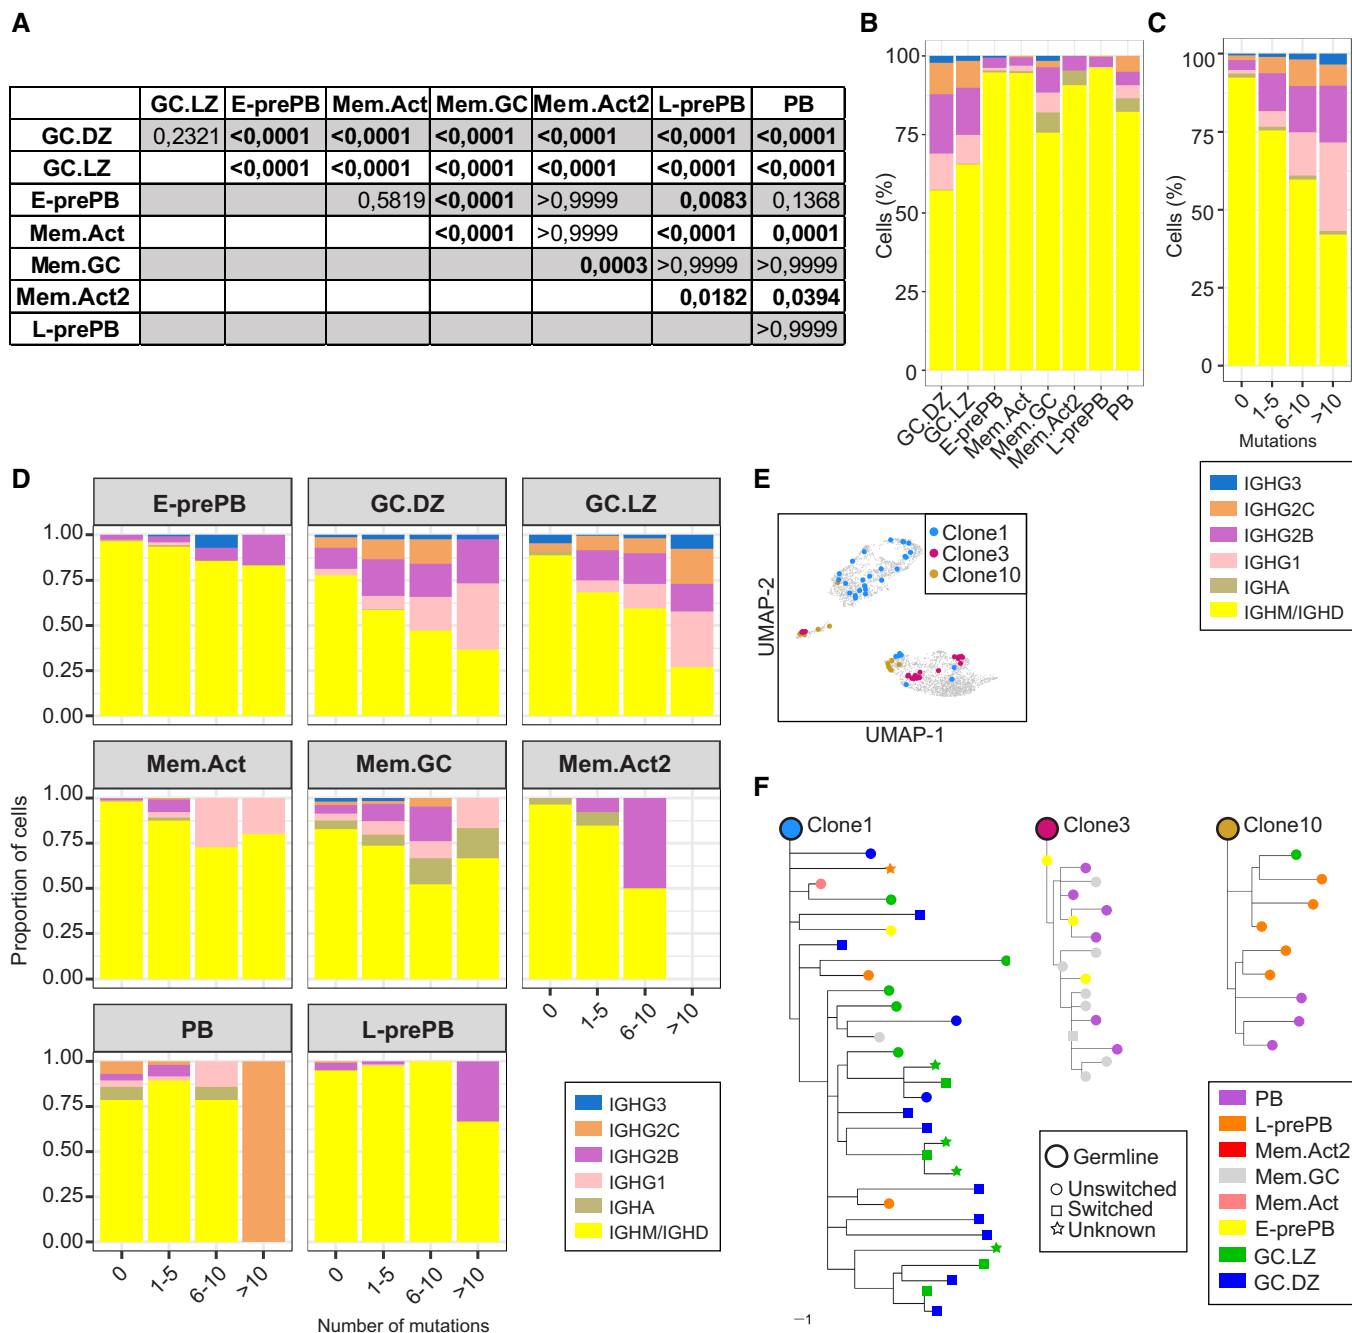

**Figure EV3. SHM and CSR analysis.**

- A P-values for the SHM data shown in Fig 4A. Statistics were calculated with the Kruskal–Wallis test.
- B Quantification of the different isotypes within B cell clusters.
- C, D Isotype quantification in total B cells (C) and individual clusters (D) according to their different mutational load.
- E UMAP plot showing 3 representative expanded clones (clone1, clone3, and clone10).
- F Trees showing phylogenetic relationships between IgH sequences of clone1, clone3, and clone10 of panel E. Scale bar: 1 mutation.

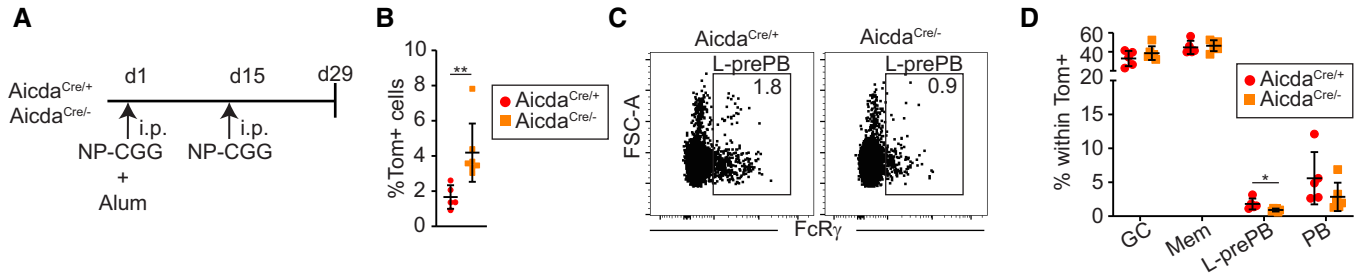

**Figure EV4. L-prePB identification in NP-CGG immunized mice.**

- A Immunization protocol. *Aicda*<sup>Cre/+</sup> (*n* = 5) and *Aicda*<sup>Cre/-</sup> (*n* = 7) mice were immunized intraperitoneally (i.p.) with NP-CGG in alum. Two weeks later, mice were boosted with NP-CGG i.p.
- B Quantification of spleen Tom<sup>+</sup> cells in NP-CGG immunized *Aicda*<sup>Cre/+</sup> (*n* = 5) and *Aicda*<sup>Cre/-</sup> (*n* = 7) mice.
- C Representative flow cytometry plots of L-prePB staining (Tom<sup>+</sup> B220<sup>+</sup> CD138<sup>-</sup> GL7<sup>-</sup> FcRγ<sup>+</sup>) in *Aicda*<sup>Cre/+</sup> and *Aicda*<sup>Cre/-</sup> mice.
- D The proportion of GC B cells (B220<sup>+</sup> Tom<sup>+</sup> CD138<sup>-</sup> GL7<sup>+</sup>), PB (Tom<sup>+</sup> CD138<sup>+</sup>), Mem (Tom<sup>+</sup> B220<sup>+</sup> CD138<sup>-</sup> GL7<sup>-</sup> CD38<sup>+</sup> FcRγ<sup>-</sup>), and L-prePB (Tom<sup>+</sup> B220<sup>+</sup> CD138<sup>-</sup> GL7<sup>-</sup> FcRγ<sup>+</sup>) was determined by flow cytometry within total Tom<sup>+</sup> cells in *Aicda*<sup>Cre/+</sup> (*n* = 5) and *Aicda*<sup>Cre/-</sup> (*n* = 7) mice.

Data information: Bars and error bars indicate mean ± standard deviation. Statistics were calculated with an unpaired *t*-test. \**P* ≤ 0.05, \*\**P* < 0.01.

**Figure EV5. Comparative clonal analysis of *Aicda*<sup>Cre/+</sup> and *Aicda*<sup>Cre/-</sup> mice.**

- A Bar plot depicting the contribution of the different transcriptional clusters in expanded clones with more than 2 cells in *Aicda*<sup>Cre/+</sup> (top) and *Aicda*<sup>Cre/-</sup> (bottom) mice.
- B UpSet plots showing quantification of clonal overlap between clusters identified in Fig 1D in *Aicda*<sup>Cre/+</sup> (left) and *Aicda*<sup>Cre/-</sup> (right). GC.LZ and GC.DZ populations were grouped and shown as GC for the sake of clarity.
- C Cytoscape representation of all cluster interactions in *Aicda*<sup>Cre/+</sup> and *Aicda*<sup>Cre/-</sup> immune response, based on their clonal sharing probabilities. Red and orange connecting lines show the most increased cluster relationships in *Aicda*<sup>Cre/+</sup> and *Aicda*<sup>Cre/-</sup> mice, respectively.

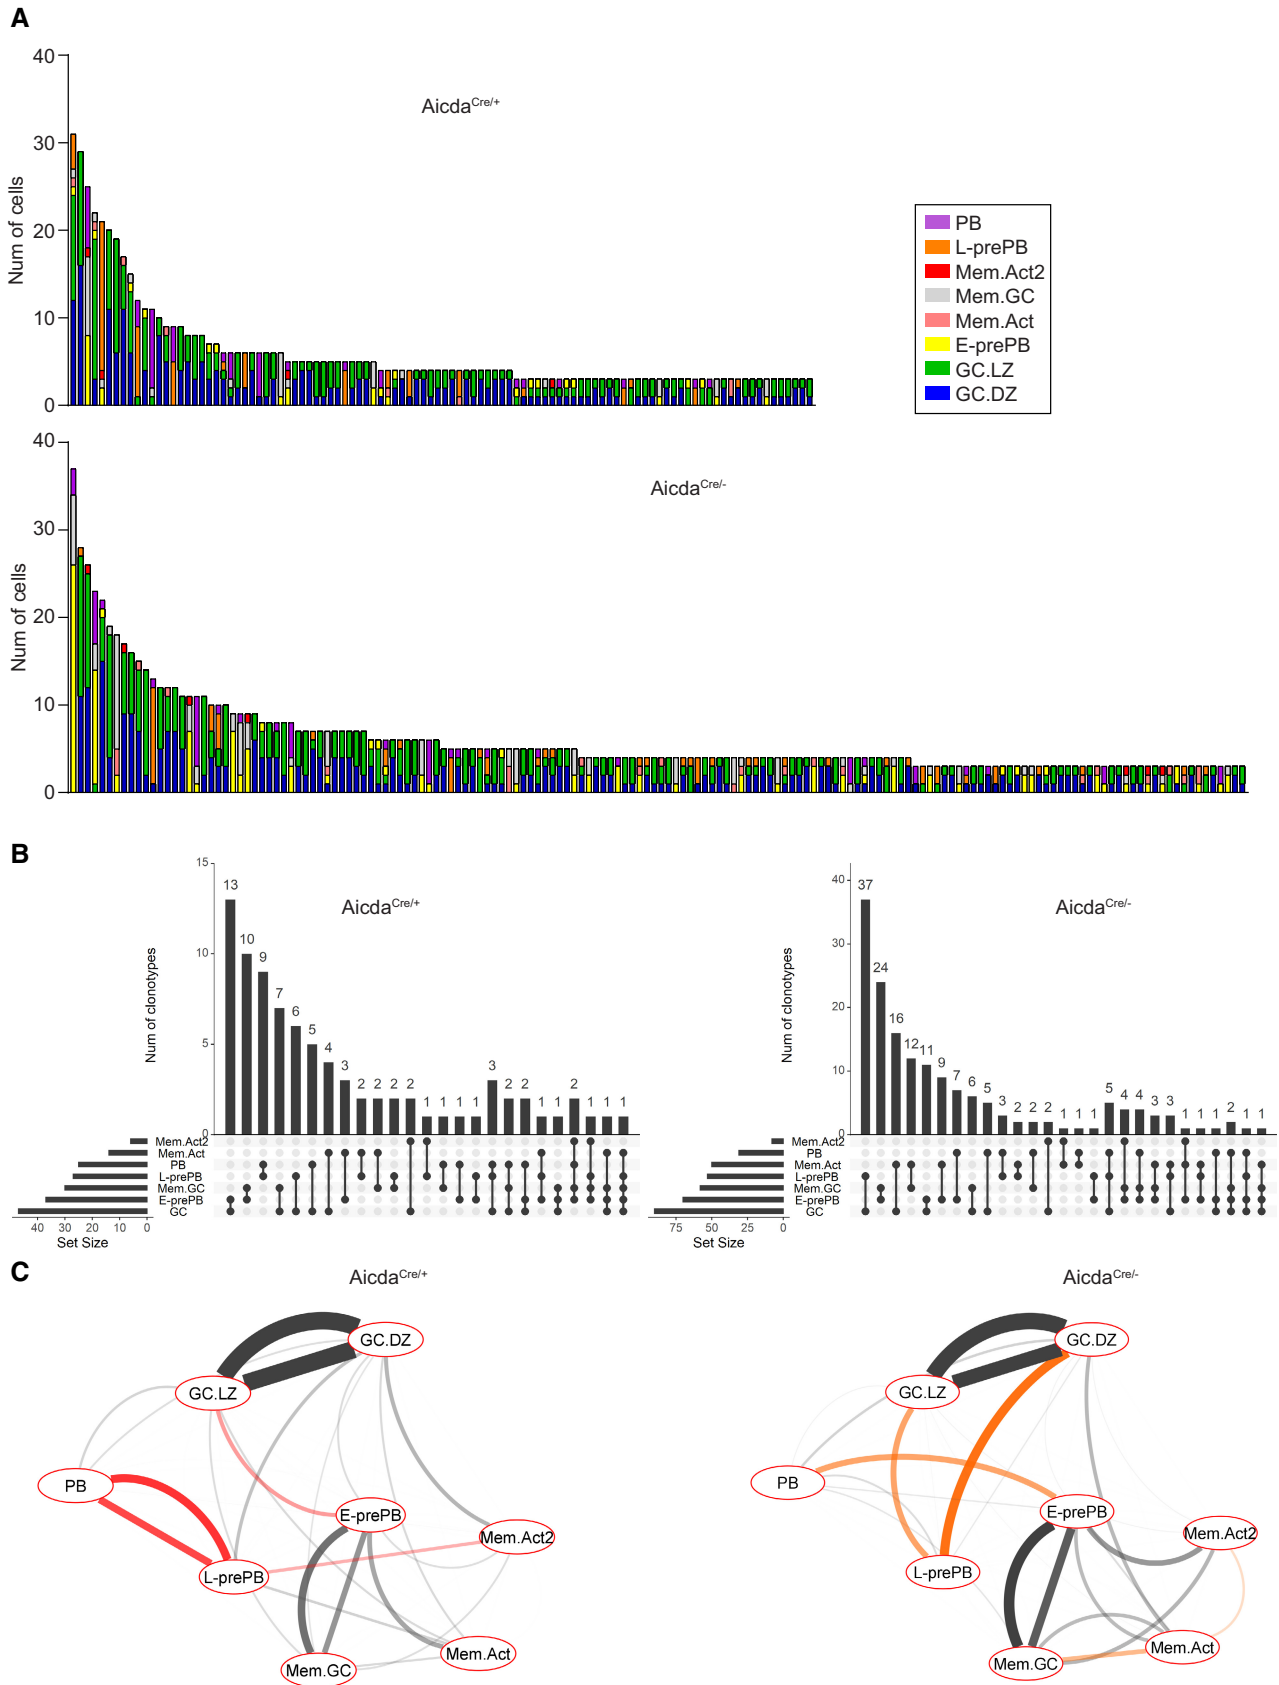

Figure EV5.
